# Supplementary material
Source: HighWire-hosted journal article supplement (https://bmjopen.bmj.com/content/10/12/e042316)
Supplement: inline-supplementary-material-3 [file inline-supplementary-material-3.pdf]

Supplement Table 3. Subgroup analysis of diabetes group and non-diabetes group

| Subgroup            | No. of patients | Diabetes | non-Diabetes | OR (95%CI)      | p value |
|---------------------|-----------------|----------|--------------|-----------------|---------|
| Overall             | 3078            | 927      | 2151         | 0.92(0.71-1.20) | 0.53    |
| Age                 |                 |          |              |                 |         |
| ≥65                 | 1811            | 550      | 1261         | 0.79(0.58-1.07) | 0.13    |
| <65                 | 1267            | 377      | 890          | 1.46(0.86-2.48) | 0.17    |
| Sex                 |                 |          |              |                 |         |
| Male                | 2033            | 577      | 1456         | 1.02(0.72-1.46) | 0.89    |
| Female              | 1045            | 350      | 695          | 0.75(0.50-1.12) | 0.16    |
| ACS categories      |                 |          |              |                 |         |
| AMI                 | 2011            | 541      | 1407         | 1.05(0.79-1.39) | 0.75    |
| UA                  | 1067            | 386      | 681          | 1.18(0.48-2.91) | 0.72    |
| Prior MI            |                 |          |              |                 |         |
| Yes                 | 296             | 107      | 189          | 0.99(0.42-2.33) | 0.99    |
| No                  | 2782            | 820      | 1962         | 0.92(0.69-1.21) | 0.53    |
| Hypertension        |                 |          |              |                 |         |
| Yes                 | 1661            | 538      | 1123         | 1.26(0.61-2.58) | 0.53    |
| No                  | 1417            | 389      | 1028         | 0.98(0.46-2.06) | 0.95    |
| Heart failure       |                 |          |              |                 |         |
| Yes                 | 1032            | 337      | 695          | 0.91(0.62-1.32) | 0.61    |
| No                  | 2046            | 590      | 1456         | 0.87(0.60-1.27) | 0.48    |
| Hyperlipidemia      |                 |          |              |                 |         |
| Yes                 | 822             | 298      | 524          | 1.69(0.97-2.95) | 0.06    |
| No                  | 2256            | 629      | 1627         | 0.81(0.59-1.10) | 0.17    |
| Cerebral infarction |                 |          |              |                 |         |
| Yes                 | 105             | 38       | 67           | 0.60(0.18-2.03) | 0.41    |
| No                  | 2973            | 889      | 2084         | 0.93(0.71-1.22) | 0.62    |
| Aspirin             |                 |          |              |                 |         |
| Yes                 | 1538            | 509      | 1029         | 0.82(0.52-1.27) | 0.37    |
| No                  | 1540            | 418      | 1122         | 1.08(0.77-1.49) | 0.7     |
| ACE inhibitor       |                 |          |              |                 |         |
| Yes                 | 1265            | 336      | 929          | 1.03(0.54-1.97) | 0.93    |
| No                  | 1813            | 591      | 1222         | 0.81(0.61-1.09) | 0.17    |
| B_Blocker           |                 |          |              |                 |         |
| Yes                 | 2221            | 662      | 1559         | 0.68(0.43-1.07) | 0.1     |
| No                  | 857             | 265      | 592          | 1.06(0.75-1.50) | 0.74    |
| Clopidogrel         |                 |          |              |                 |         |
| Yes                 | 635             | 219      | 416          | 1.05(0.56-1.98) | 0.88    |
| No                  | 2443            | 708      | 1735         | 0.91(0.68-1.22) | 0.53    |
| Diuretic            |                 |          |              |                 |         |
| Yes                 | 1650            | 559      | 1091         | 0.82(0.55-1.22) | 0.32    |
| No                  | 1428            | 368      | 1060         | 1.11(0.78-1.59) | 0.56    |
| Statin              |                 |          |              |                 |         |
| Yes                 | 1381            | 444      | 937          | 0.87(0.49-1.55) | 0.64    |

|                        |      |     |      |                 |        |
|------------------------|------|-----|------|-----------------|--------|
| No                     | 1697 | 483 | 1214 | 0.99(0.73-1.34) | 0.96   |
| Insulin                |      |     |      |                 |        |
| Yes                    | 1397 | 614 | 783  | 1.40(0.99-2.00) | 0.06   |
| No                     | 1681 | 313 | 1368 | 0.80(0.52-1.21) | 0.29   |
| WBC, 103/uL            |      |     |      |                 |        |
| ≥ 11.5                 | 1372 | 397 | 975  | 0.82(0.59-1.16) | 0.26   |
| <11.5                  | 1706 | 530 | 1176 | 1.19(0.77-1.84) | 0.43   |
| Hemoglobin, mg/dl      |      |     |      |                 |        |
| ≥12                    | 1368 | 327 | 1041 | 0.86(0.52-1.42) | 0.55   |
| <12                    | 1710 | 600 | 1110 | 0.86(0.62-1.17) | 0.33   |
| Creatinine, mg/dl      |      |     |      |                 |        |
| ≥1                     | 1557 | 545 | 1012 | 0.92(0.68-1.23) | 0.56   |
| <1.0                   | 1521 | 382 | 1139 | 0.39(0.16-0.83) | 0.01   |
| SOFA score             |      |     |      |                 |        |
| ≥4                     | 1433 | 504 | 929  | 0.83(0.62-1.12) | 0.23   |
| <4                     | 1645 | 423 | 1222 | 0.51(0.25-1.05) | 0.07   |
| glucose <sub>max</sub> |      |     |      |                 |        |
| ≥11.1                  | 1218 | 624 | 594  | 0.42(0.31-0.57) | <0.001 |
| <11.1                  | 1860 | 303 | 1557 | 0.98(0.55-1.76) | 0.96   |

Abbreviations: OR, odds ratio; CI, confidence interval; ACS, acute coronary syndrome; AMI, acute myocardial infarction; UA, unstable angina; ACE, angiotension converting enzyme; WBC, white blood cell; SOFA, sequential organ failure assessment; glucose<sub>max</sub>, maximum glucose during ICU stay.
